# Supplementary material for: Determination of valproic acid and 3-heptanone in plasma using air-assisted liquid-liquid microextraction with the assistance of vortex: Application in the real samples
Source: PubMed Central journal article supplement — Bioimpacts. 2019 Mar 8;9(2):105–13. doi: 10.15171/bi.2019.14 (PMC6637214; doi:10.15171/bi.2019.14), 2019-03-08
Supplement: bi-9-105-s001.pdf [file bi-9-105-s001.pdf]

## Determination of valproic acid and 3-heptanone in plasma using air-assisted liquid-liquid microextraction with the assistance of vortex: Application in the real samples

Behruz Feriduni<sup>1</sup>, Mohammad Barzegar<sup>2</sup>, Shahram Sadeghvand<sup>3</sup>, Shadi Shiva<sup>4</sup>, Maryam Khoubnasabjafari<sup>5</sup>, Abolghasem Jouyban<sup>1,6\*</sup>

<sup>1</sup> Pharmaceutical Analysis Research Center, Faculty of Pharmacy, Tabriz University of Medical Sciences, Tabriz, Iran

<sup>2</sup> Pediatric Health Research Center, Tabriz University of Medical Sciences, Tabriz, Iran

<sup>3</sup> Student Research Committee, Faculty of Medicine, Tabriz University of Medical Sciences, Tabriz, Iran

<sup>4</sup> Liver and Gastrointestinal Diseases Research Center, Tabriz University of Medical Sciences, Tabriz, Iran

<sup>5</sup> Lung and Tuberculosis Diseases Research Center, Tabriz University of Medical Science, Tabriz, Iran

<sup>6</sup> Kimia Idea Pardaz Azarbayjan (KIPA) Science Based Company, Tabriz University of Medical Sciences, Tabriz, Iran

Table S1. List of co-administered drugs, levels of VPA and 3-heptanone in plasma samples of the patients

| No. | Age (year) | Weight (Kg) | Co-administered AEDs <sup>a)</sup> | VPA concentration (mg L <sup>-1</sup> ) | 3-Heptanone concentration (mg L <sup>-1</sup> ) |
|-----|------------|-------------|------------------------------------|-----------------------------------------|-------------------------------------------------|
| 1   | 6          | 17          | Pb                                 | 22.0                                    | 1.1                                             |
| 2   | 2          | 14          | -                                  | 3.0                                     | 4.0                                             |
| 3   | 13         | 50          | Pb, Ph                             | 6.0                                     | 3.0                                             |
| 4   | 5          | 13          | Pb, Ph                             | 28.0                                    | ND <sup>b)</sup>                                |
| 5   | 8          | 23          | Ph                                 | 6.0                                     | 2.0                                             |
| 6   | 10         | 16          | Pb, Ph                             | 18.0                                    | 0.3                                             |
| 7   | 10         | 48          | Pb                                 | 13.0                                    | 0.4                                             |
| 8   | 1          | 15          | Pb                                 | 15.0                                    | 0.9                                             |
| 9   | 8.5        | 23          | Pb, Ph                             | 23.0                                    | 2.0                                             |
| 10  | 14         | 55          | Pb, Ph                             | 15.0                                    | ND                                              |
| 11  | 8.5        | 26          | Ph                                 | 11.0                                    | 0.1                                             |
| 12  | 2          | 14          | Pb, CBZ                            | 17.0                                    | 0.3                                             |
| 13  | 9          | 25          | Pb                                 | 16.0                                    | 0.5                                             |
| 14  | 12         | 30          | Pb, CBZ                            | 6.0                                     | 2.0                                             |
| 15  | 3.5        | 18          | Ph                                 | 13.0                                    | 0.9                                             |
| 16  | 13         | 35          | Pb                                 | 31.0                                    | 0.2                                             |
| 17  | 2.5        | 9           | Pb                                 | 1.0                                     | 3.0                                             |
| 18  | 1          | 10          | Pb                                 | ND                                      | ND                                              |

|    |                |                |         |      |     |
|----|----------------|----------------|---------|------|-----|
| 19 | 11             | 35             | Pb      | 21.0 | 0.3 |
| 20 | 10             | 18             | Pb      | 1.0  | 2.5 |
| 21 | 10             | 26             | Pb      | 25.0 | 0.1 |
| 22 | 3.5            | 18             | Pb      | 27.0 | ND  |
| 23 | 7              | 17             | Pb, Ph  | 14.0 | 0.2 |
| 24 | 15             | 46             | -       | 29.0 | 0.1 |
| 25 | 3              | 18             | -       | 7.0  | 1.8 |
| 26 | 14             | 40             | CBZ     | 24.0 | 0.5 |
| 27 | 11             | 14             | Pb      | 33.0 | 0.4 |
| 28 | 9              | 22             | Pb      | 38.0 | ND  |
| 29 | 9              | 37             | Pb, Ph  | 27.0 | 0.8 |
| 30 | 10             | 26             | Pb, CBZ | 43.0 | 1.5 |
| 31 | 10             | 26             | Pb, Ph  | 14.0 | 0.3 |
| 32 | 13             | 36             | -       | 27.0 | 0.7 |
| 33 | 5              | 18             | Pb      | 27.0 | 0.4 |
| 34 | 8              | 22             | -       | 34.0 | 0.8 |
| 35 | 5              | 15             | -       | 13.0 | 0.9 |
| 36 | 14             | 91             | Pb, Ph  | 33.0 | 0.2 |
| 37 | 10             | 29             | -       | ND   | 3.0 |
| 38 | 9              | 38             | Pb      | 10.0 | 0.8 |
| 39 | 8              | 34             | Pb      | 26.0 | 0.3 |
| 40 | 8              | 22             | CBZ     | 25.0 | 0.4 |
| 41 | 3              | 25             | Pb      | 88.0 | 2.0 |
| 42 | 7              | 32             | Pb      | 15.0 | 0.4 |
| 43 | 2              | 11.5           | Pb, Ph  | 34.0 | 0.1 |
| 44 | 13             | 44             | -       | 36.0 | 0.3 |
| 45 | 2.5            | 11             | Pb      | 59.0 | 0.1 |
| 46 | 2              | 14             | -       | 9.0  | 1.3 |
| 47 | 3.5            | 16             | Pb, CBZ | 29.0 | 0.4 |
| 48 | 2.5            | 14.5           | Pb      | 59.0 | 0.7 |
| 49 | 13             | 36             | Pb, CBZ | 15.0 | 1.4 |
| 50 | 4.5            | 17             | Pb      | 21.0 | 0.8 |
| 51 | 14             | 36             | CBZ     | 15.0 | 1.0 |
| 52 | 9              | 30             | Pb, CBZ | 18.0 | 0.4 |
| 53 | 6              | 16             | CBZ     | 21.0 | 0.5 |
| 54 | 10             | 19             | Pb, CBZ | ND   | 1.1 |
| 55 | 4              | 15             | Pb, CBZ | 13.0 | 0.6 |
| 56 | 10             | 36             | Pb, CBZ | 25.0 | 0.3 |
| 57 | 18             | 36             | Pb, CBZ | ND   | ND  |
| 58 | 8              | 31             | CBZ     | 28.0 | 0.2 |
| 59 | 2              | 27             | CBZ     | 50.0 | 0.8 |
| 60 | 7              | 23             | Pb, Ph  | ND   | 1.8 |
| 61 | 13             | 31             | Pb      | 27.0 | 0.4 |
| 62 | - <sup>c</sup> | - <sup>c</sup> | Pb      | 20.0 | 0.4 |
| 63 | -              | -              | Pb      | 28.0 | 0.2 |

|    |   |   |         |      |     |
|----|---|---|---------|------|-----|
| 64 | - | - | Pb      | 12.0 | 0.6 |
| 65 | - | - | Pb, CBZ | 22.0 | 0.5 |
| 66 | - | - | Pb      | 12.0 | 0.7 |
| 67 | - | - | Pb      | 16.0 | 0.7 |
| 68 | - | - | -       | 9.0  | 0.9 |
| 69 | - | - | Pb      | 30.0 | 0.3 |
| 70 | - | - | Ph      | 22.0 | 0.4 |

---

a) Pb: Phenobarbital, Ph: Phenytoin, CBZ: Carbamazepin.

b) Not detected.

c) Not recorded.
